# Supplementary material for: Novel phenanthroline-based ruthenium complexes for dye-sensitized solar cells: enhancement in performance through fluoro-substitution
Source: Royal Society of Chemistry journal article supplement (doi:10.1039/c3ra43018a), 2013-01-01
Supplement: c3ra43018a.pdf [file c3ra43018a.pdf]

## Supporting Information

### **A fluorine substituted phenanthroline-based ruthenium complex for dye-sensitized solar cells: the fluoro-substitution effect on the ancillary ligand**

*Qiong-Yan Yu, Jian-Feng Huang, Yong Shen, Li-Min Xiao, Jun-Min Liu,\* Dai-Bin Kuang, Cheng-Yong Su\**

<sup>a</sup> MOE Laboratory of Bioinorganic and Synthetic Chemistry, State Key Laboratory of Optoelectronic Materials and Technologies, Lehn Institute of Functional Materials, School of Chemistry and Chemical Engineering, Sun Yat-Sen University, Guangzhou 510275, China.

## Experimental Section

**Synthesis of 1,10-phenanthroline-5,6-dione.** Solid KBr (12.0 g, 100 mmol,) and 1,10-phenanthroline (1.08 g, 10 mmol) were placed in a two-necked flask immersed in a ice/water bath, and then concentrated H<sub>2</sub>SO<sub>4</sub> (98%, 20 mL) and concentrated HNO<sub>3</sub> (68%, 20 mL) as added dropwise with stirring. The resulting mixture was stirred for 30 min at room temperature and then for 4 h at 80 °C. The reaction was neutralized to pH=6 with aqueous ammonia solution after cooling to room temperature. CH<sub>2</sub>Cl<sub>2</sub> was layered over the suspension and the two-phase mixture was stirred until the solid had dissolved. The organic phase was separated, washed with water and concentrated to dryness. The crude product was purified by recrystallization from CH<sub>2</sub>Cl<sub>2</sub> and ethanol. Yield: 80%.

**Synthesis of 2-(4-fluorinphenyl)-1H-imidazo[4,5-f][1,10]phenanthroline (L<sub>F</sub>).** A mixture of 1,10-phenanthroline-5,6-dione (210 mg, 1 mmol), ammonium acetate (1.54 g, 20 mmol), 4-fluorobenzaldehyde (136 mg, 1.1 mmol) and glacial acetic acid (30 mL) was heated at 120 °C for 4 h. After the reaction cooled to room temperature and neutralized with concentrated aqueous ammonia, the yellow precipitate was collected and washed with water. The crude product was purified by recrystallization from chloroform/ethanol to obtain 2-(4-fluorinphenyl)-1Himidaz[4,5-f][1,10]phenanthroline as a yellow-white solid. Yield: 70%. <sup>1</sup>H-NMR (300 MHz, DMSO-*d*<sub>6</sub>, δ ppm): 7.45 (t, *J* = 8.7 Hz, 2H; phenyl), 7.81 (m, 2H, phenyl), 8.31(d, *J* = 2.7 Hz, 2H, phenyl), 8.87(m, 2H, phen), 9.01 (d, *J* = 3.9 Hz, 2H, phenyl). MS(ESI *m/z*): 315.10 ([M+H]<sup>+</sup>), found 315.17 ([M+H]<sup>+</sup>).

**Synthesis of 4-(1H-imidazo[4,5-f]-[1,10]phenanthrolin-2-yl)-N,N-dimethylaniline (L<sub>N</sub>).** L<sub>N</sub> was synthesized by a procedure to L<sub>F</sub> except that 4-(dimethylamino) benzaldehyde was used in place of 4-fluorobenzaldehyde. Yield: 65%. <sup>1</sup>H-NMR (300 MHz, DMSO-*d*<sub>6</sub>, δ ppm): 3.01(s, 3H), 3.32(s, 3H), 6.87(d, *J* = 9.0 Hz, 2H, phenyl), 7.78(m, *J* = 6.9 Hz, 2H, phenyl), 8.88(d, *J* = 1.2 Hz, 2H, phenyl), 8.97(d, *J* = 3.0 Hz, 2H, phenyl). MS (ESI *m/z*): 311.13 ([M+H]<sup>+</sup>), found 311.20 ([M+H]<sup>+</sup>).

**Synthesis of 2-(4-methylphenyl)-1H-imidazo[4,5-f][1,10]phenanthroline (L<sub>C</sub>).** L<sub>C</sub> was synthesized by a procedure to L<sub>F</sub> except that 4-methylbenzaldehyde was used in place of 4-fluorobenzaldehyde. Yield: 70%. <sup>1</sup>H-NMR (300 MHz, DMSO-*d*<sub>6</sub>, δ ppm): 2.40 (s, 3H), 7.38(d, *J* = 8.1 Hz, 2H), 7.85(d, *J* = 4.2 Hz, 2H, phenyl), 8.15 (d, *J* = 7.8 Hz, 2H, phenyl), 8.90 (d, *J* = 4.5 Hz, 2H, phenyl), 8.99 (m, 2H; phenyl). MS (ESI *m/z*): 340.16 ([M+H]<sup>+</sup>), found 340.23 ([M+H]<sup>+</sup>).

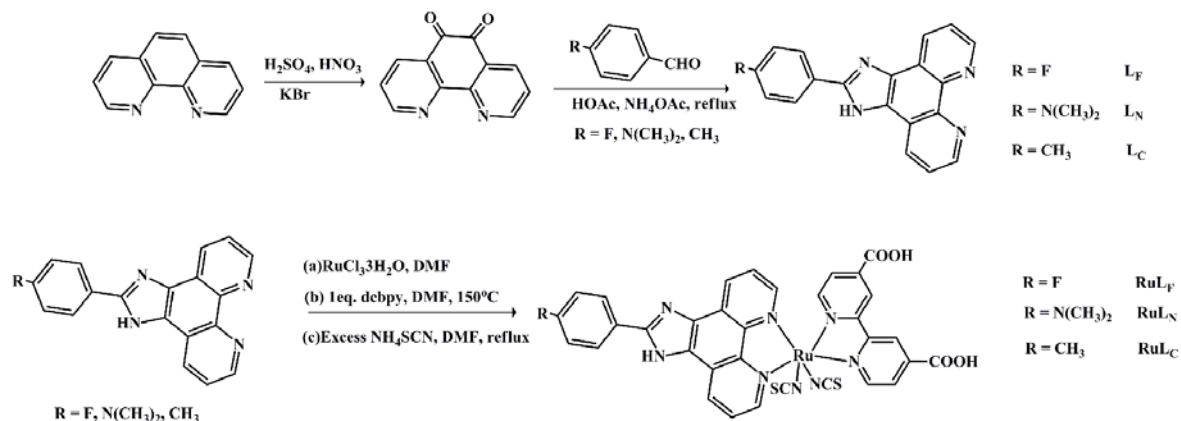

**Scheme S1**

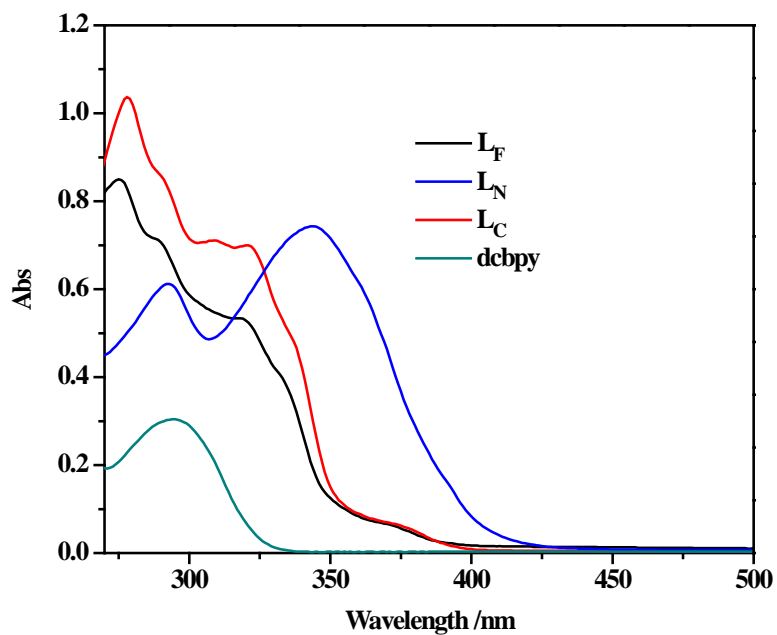

Fig. S1 Absorption spectra of  $L_F$ ,  $L_N$ ,  $L_C$ , and  $H_2dcbpy$  in DMF

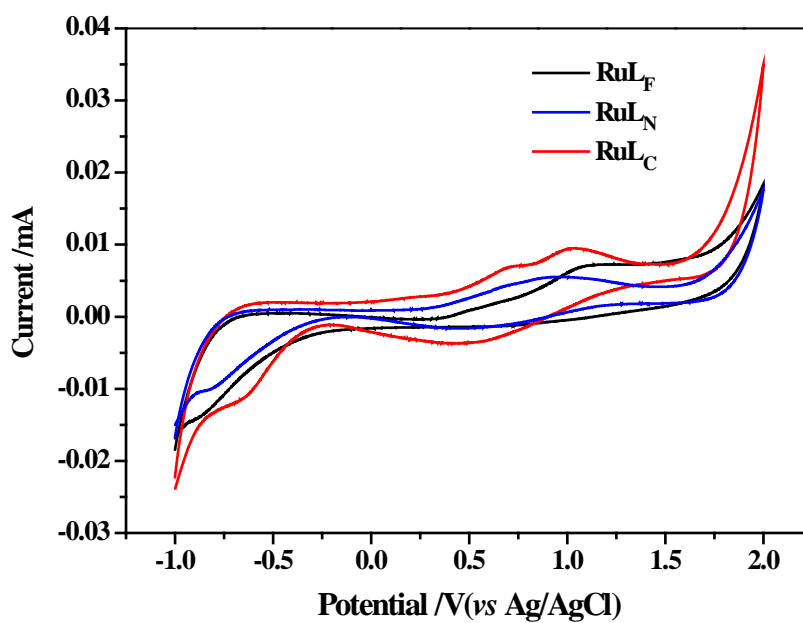

Fig. S2 Cyclic voltammograms of  $RuL_F$ ,  $RuL_N$ , and  $RuL_C$  in a DMF solution of  $TBAPF_6$  (0.1 M). (The concentrations of three dyes were  $3 \times 10^{-3}$  M).

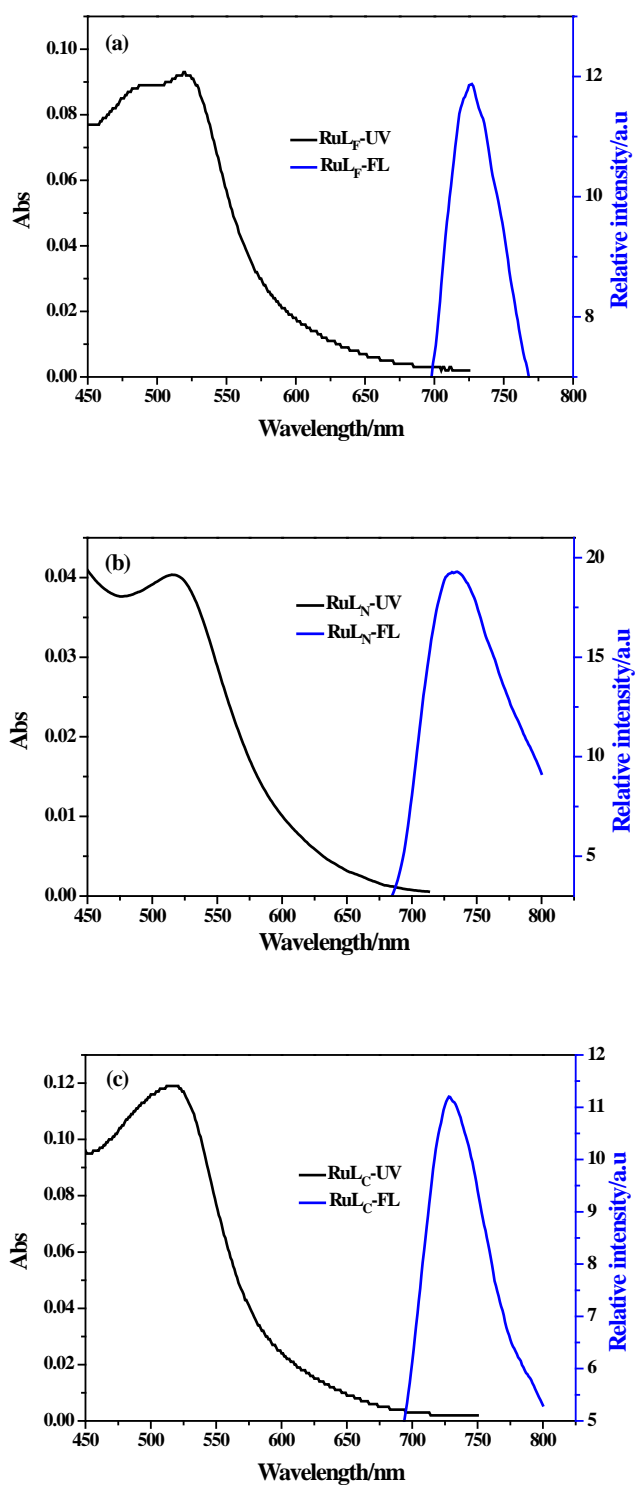

**Fig. S3** Absorption and emission spectra of (a)  $\text{RuL}_F$ , (b)  $\text{RuL}_N$ , and (c)  $\text{RuL}_C$  measured in DMF.

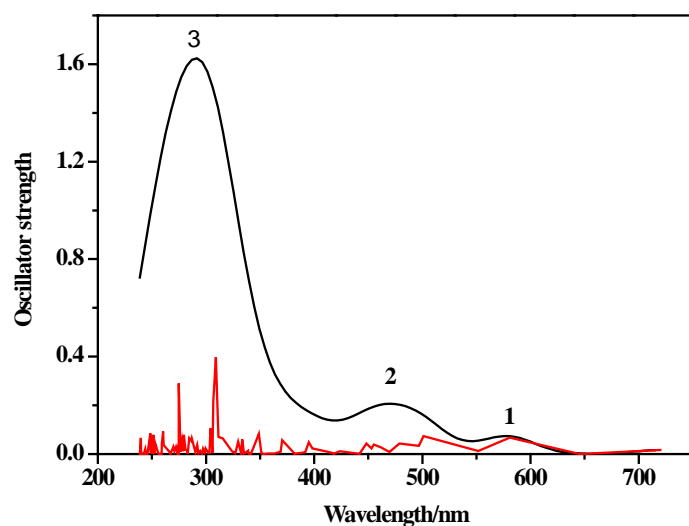

**Fig. S4** computed spectrum of **RuL<sub>F</sub>**

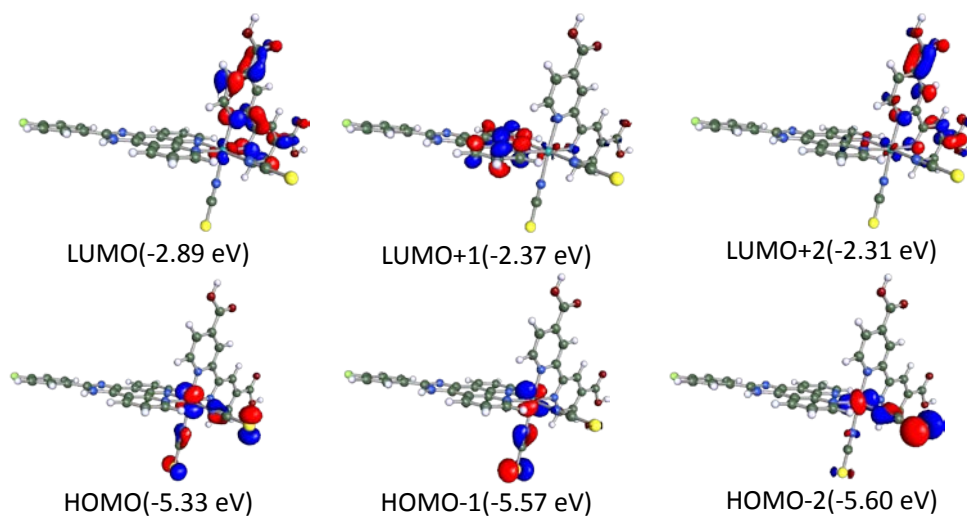

**Fig. S5** Computed isosurface plots of selected molecular orbitals (from HOMO-2 to LUMO+2) of dye **RuL<sub>F</sub>**, which are mainly involved in the optically active electronic transitions 1 and 2.

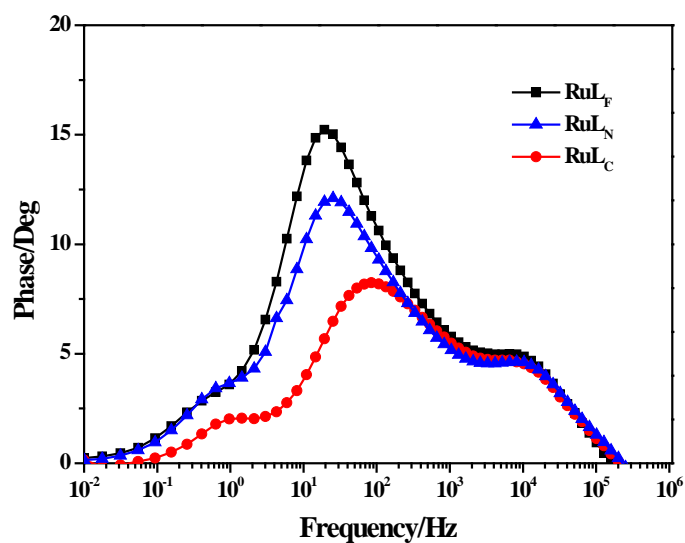

**Fig. S6** EIS bode plots (i.e. the phase of the impedance vs the frequency) for DSSCs based on **RuL<sub>F</sub>**, **RuL<sub>N</sub>**, and **RuL<sub>C</sub>** dyes.

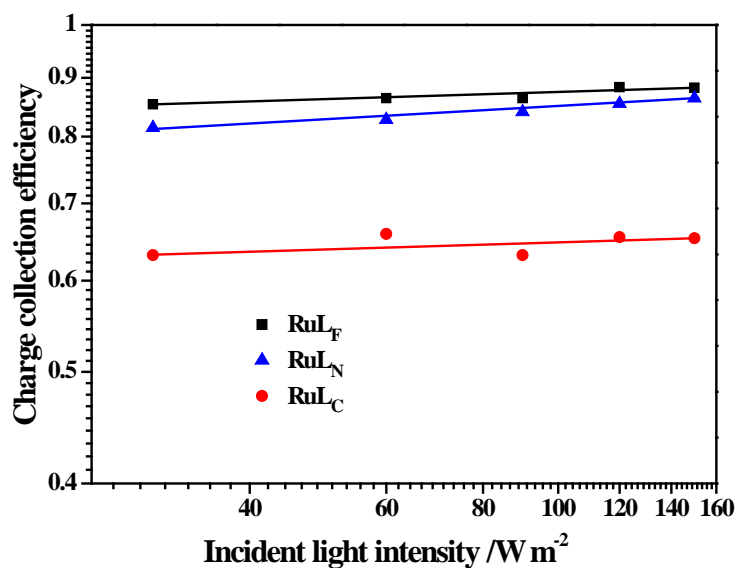

**Fig. S7** Charge collection efficiencies from IMPS and IMVS for DSSCs based on **RuL<sub>F</sub>**, **RuL<sub>N</sub>**, and **RuL<sub>C</sub>** dyes.

**Table S1** Character table of calculated vertical excitations 1, 2, and 3 for dye **RuL<sub>F</sub>**<sup>a</sup>

| Dye                    | Elec. transition | Calcn. (nm) | Exp. (nm)     | Composition   |       |
|------------------------|------------------|-------------|---------------|---------------|-------|
| <b>RuL<sub>F</sub></b> | 1                | 580         | 512           | HOMO-2→LUMO   | 70.6% |
|                        |                  |             |               | HOMO→LUMO+2   | 12.8% |
|                        | 2                | 501         | 470           | HOMO-1→LUMO+1 | 38.5% |
|                        |                  |             |               | HOMO→LUMO+2   | 28.4% |
|                        | 3                | 311         | 302           | HOMO-6→LUMO+2 | 31.4% |
|                        |                  |             |               | HOMO-8→LUMO   | 23.4% |
|                        |                  |             | HOMO-4→LUMO+4 | 18.4%         |       |

<sup>a</sup> Contributions below 12% are not shown.

**Table S2** Influence of CDCA on the photovoltaic performance parameters

| dye                         | $J_{sc}/\text{mA cm}^{-2}$ | $V_{oc}/\text{mV}$ | $FF$ | $\eta$ (%) |
|-----------------------------|----------------------------|--------------------|------|------------|
| <b>RuL<sub>F</sub></b>      | 14.02                      | 675                | 0.72 | 6.85       |
| <b>RuL<sub>F</sub>-CDCA</b> | 15.39                      | 656                | 0.72 | 7.28       |
